# Supplementary material
Source: publisher figshare collection journal article supplement (https://acs.figshare.com/ndownloader/files/5056189)
Supplement: Supplementary file 1 [file 5056189]

SUPPORTING INFORMATION FOR:

Atmospheric Deposition of Current-Use and Historic-Use Pesticides in Snow at National  
Parks in the Western United States

*Kimberly J. Hageman, Staci L. Simonich, Donald H. Campbell, Glenn R. Wilson, and  
Dixon H. Landers*

Number of Pages: 10

Number of Supporting Tables: 4

Number of Supporting Figures: 4

Includes References

**SI Table 1.** Sample information including site location, mean winter (November 2002 to March 2003) air temperatures at the site, snow-water equivalent (SWE), particulate matter concentration, and regional cropland intensity. Regional cropland intensity is cropland area as a percentage of total land area within a 150-km radius of the park.

| <b>Park &amp; Site Names</b> | <b>Latitude,<br/>°N</b> | <b>Longitude,<br/>°W</b> | <b>Elevation,<br/>masl<sup>1</sup></b> | <b>Mean Winter<br/>Air Temp., °C</b> | <b>SWE,<br/>m</b> | <b>Particulate<br/>Matter, mg/L</b> | <b>Cropland<br/>Intensity</b> |
|------------------------------|-------------------------|--------------------------|----------------------------------------|--------------------------------------|-------------------|-------------------------------------|-------------------------------|
| <b>Sequoia</b>               |                         |                          |                                        |                                      |                   |                                     |                               |
| Emerald Lake <sup>2</sup>    | 36.60                   | 118.67                   | 2908                                   | -3.0                                 | 0.95              | 2.4, 2                              | 11                            |
| Pear Lake                    | 36.60                   | 118.66                   | 2950                                   | -3.7                                 | 0.93              | 6.2                                 | 11                            |
| <b>Rocky</b>                 |                         |                          |                                        |                                      |                   |                                     |                               |
| Lake Irene <sup>2</sup>      | 40.41                   | 105.82                   | 3243                                   | -8.5                                 | 0.76              | 8.6, 2.4                            | 8.1                           |
| Lone Pine Lake               | 40.22                   | 105.73                   | 2975                                   | -7.1                                 | 0.40              | 19                                  | 8.1                           |
| Mills Lake                   | 40.29                   | 105.64                   | 3056                                   | -7.1                                 | 0.91              | 45                                  | 8.1                           |
| <b>Rainier<sup>3</sup></b>   |                         |                          |                                        |                                      |                   |                                     |                               |
| Alta Vista                   | 46.79                   | 126.73                   | 1730                                   | -2.9                                 | 1.2               | 0.12                                | 3.1                           |
| Alta Vista                   | 46.79                   | 126.73                   | 1730                                   | -2.9                                 | 1.3               | 0.51                                | 3.1                           |
| <b>Glacier</b>               |                         |                          |                                        |                                      |                   |                                     |                               |
| Lower Snyder Lake            | 48.63                   | 113.79                   | 1600                                   | -3.5                                 | 0.36              | 7.3                                 | 11                            |
| Aster Park                   | 48.46                   | 113.38                   | 1922                                   | -6.3                                 | 0.73              | 8.9                                 | 11                            |
| <b>Denali</b>                |                         |                          |                                        |                                      |                   |                                     |                               |
| Kahiltna Base Camp           | 62.97                   | 151.17                   | 2153                                   | -21                                  | 1.2               | 0.13                                | 0                             |
| McLeod Lake                  | 63.38                   | 151.07                   | 609                                    | -11                                  | 0.042             | 50                                  | 0                             |
| Wonder Lake                  | 63.48                   | 150.88                   | 610                                    | -11                                  | 0.048             | 56                                  | 0                             |
| <b>Noatak</b>                |                         |                          |                                        |                                      |                   |                                     |                               |
| Burial Lake                  | 68.43                   | 159.18                   | 427                                    | -22                                  | 0.60              | 1.4                                 | 0                             |
| <b>Gates of the Arctic</b>   |                         |                          |                                        |                                      |                   |                                     |                               |
| Matcharak Lake               | 67.75                   | 156.21                   | 488                                    | -22                                  | 0.13              | 24                                  | 0                             |

<sup>1</sup>Meters above sea level. <sup>2</sup>Sites at which field replicates were collected; particulate matter is provided for each replicate. <sup>3</sup>Two samples were collected at Alta Vista; the first one listed was collected on March 4, 2005 (before a snow event) whereas the second one listed was collected on March 17, 2005 (after the snow event).

**SI Table 2.** Concentrations in seasonal snowpack samples (collected March-April 2003) for the most frequently-detected current-use and historic-use pesticides.

| Park Name                  | Concentration, ng/L (%RSD) <sup>1</sup> |                                 |                               |                    |                         |                    |                              |                  |
|----------------------------|-----------------------------------------|---------------------------------|-------------------------------|--------------------|-------------------------|--------------------|------------------------------|------------------|
|                            | Current-Use Pesticides                  |                                 |                               |                    | Historic-Use Pesticides |                    |                              |                  |
|                            | Dacthal                                 | Total Chlorpyrifos <sup>4</sup> | Total Endosulfan <sup>5</sup> | γ-HCH <sup>6</sup> | Dieldrin                | α-HCH <sup>7</sup> | Total Chlordane <sup>8</sup> | HCb <sup>9</sup> |
| <b>Sequoia</b>             |                                         |                                 |                               |                    |                         |                    |                              |                  |
| Emerald Lake <sup>2</sup>  | 5.3 (14)                                | 2.8 (3.2)                       | 1.5 (5.9)                     | 0.062 (2.1)        | 0.30 (14)               | 0.080 (14)         | 0.050 (4.4)                  | 0.016 (31)       |
| Pear Lake                  | 3.2                                     | 1.3                             | 1.2                           | 0.064              | 4.8                     | 0.081              | 0.13                         | 0.072            |
| <b>Rocky</b>               |                                         |                                 |                               |                    |                         |                    |                              |                  |
| Lake Irene <sup>2</sup>    | 0.95 (10)                               | 0.033 (3.1)                     | 0.92 (1.3)                    | 0.080 (16)         | 0.26 (8.2)              | 0.077 (11)         | 0.029 (9.4)                  | 0.0065 (3.9)     |
| Lone Pine Lake             | 1.1                                     | --                              | 0.96                          | 0.066              | 0.22                    | 0.079              | 0.017                        | --               |
| Mills Lake                 | 1.1                                     | --                              | 1.3                           | 0.12               | 0.34                    | 0.14               | 0.011                        | --               |
| <b>Rainier<sup>3</sup></b> |                                         |                                 |                               |                    |                         |                    |                              |                  |
| Alta Vista                 | --                                      | 0.048                           | 0.14                          | <0.012             | <0.048                  | 0.063              | 0.016                        | --               |
| Alta Vista                 | 0.030                                   | 0.056                           | 0.17                          | 0.048              | <0.048                  | 0.094              | 0.014                        | --               |
| <b>Glacier</b>             |                                         |                                 |                               |                    |                         |                    |                              |                  |
| Lower Snyder Lake          | 0.75                                    | 0.085                           | 0.82                          | 0.11               | 0.23                    | 0.086              | 0.018                        | 0.018            |
| Aster Park                 | 0.61                                    | 0.53                            | 0.80                          | 0.21               | 0.33                    | 0.17               | 0.020                        | 0.015            |
| <b>Denali</b>              |                                         |                                 |                               |                    |                         |                    |                              |                  |
| Kahiltna Base Camp         | 0.022                                   | 0.026                           | 0.14                          | <0.012             | 0.056                   | <0.018             | 0.0098                       | 0.0032           |
| McLeod Lake                | 0.016                                   | 0.024                           | 0.044                         | <0.012             | <0.0020                 | <0.018             | 0.015                        | 0.012            |
| Wonder Lake                | --                                      | 0.010                           | <0.0040                       | <0.012             | <0.0020                 | <0.018             | 0.0018                       | --               |
| <b>Noatak</b>              |                                         |                                 |                               |                    |                         |                    |                              |                  |
| Burial Lake                | 0.0065                                  | 0.024                           | 0.19                          | 0.072              | 0.054                   | 0.20               | 0.016                        | 0.0038           |
| <b>Gates of the Arctic</b> |                                         |                                 |                               |                    |                         |                    |                              |                  |
| Matcharak Lake             | 0.0039                                  | 0.030                           | 0.051                         | <0.012             | 0.035                   | <0.018             | 0.059                        | 0.0072           |

<sup>1</sup>RSD is relative standard deviation. Nondetects are depicted as having concentrations less than (<) their estimated method detection limits. Cases in which lab-blank concentrations exceeded 33% of sample concentrations are marked with '--'. <sup>2</sup>Sites at which field replicates were collected. <sup>3</sup>Two samples were collected at Alta Vista; the first one listed was collected on March 4, 2005 (before a snow event) whereas the second one listed was collected on March 17, 2005 (after the snow event). <sup>4</sup>Total chlorpyrifos is the sum of chlorpyrifos and chlorpyrifos oxon, <sup>5</sup>Total endosulfan is the sum of endosulfan I, endosulfan II, and endosulfan sulfate. <sup>6</sup>γ-HCH is γ-hexachlorocyclohexane. <sup>7</sup>α-HCH is α-hexachlorocyclohexane. <sup>8</sup>Total chlordane is the sum of trans-chlordane, cis-nonachlor, and trans-nonachlor. <sup>9</sup>HCb is hexachlorobenzene.

**SI Table 3.** Depositions in seasonal snowpack samples (collected March-April 2003) for the most frequently-detected current-use and historic-use pesticides.

| Park Name                  | Deposition, ng/m <sup>2</sup> (%RSD) <sup>1</sup> |                                 |                               |                    |                         |                    |                              |                  |
|----------------------------|---------------------------------------------------|---------------------------------|-------------------------------|--------------------|-------------------------|--------------------|------------------------------|------------------|
|                            | Current-Use Pesticides                            |                                 |                               |                    | Historic-Use Pesticides |                    |                              |                  |
|                            | Dacthal                                           | Total Chlorpyrifos <sup>4</sup> | Total Endosulfan <sup>5</sup> | γ-HCH <sup>6</sup> | Dieldrin                | α-HCH <sup>7</sup> | Total Chlordane <sup>8</sup> | HCb <sup>9</sup> |
| <b>Sequoia</b>             |                                                   |                                 |                               |                    |                         |                    |                              |                  |
| Emerald Lake <sup>2</sup>  | 5100 (14)                                         | 2600 (3.1)                      | 1400 (5.9)                    | 59 (2.1)           | 280 (14)                | 76 (14)            | 47 (4.4)                     | 15 (31)          |
| Pear Lake                  | 3000                                              | 1200                            | 1100                          | 60                 | 4400                    | 75                 | 120                          | 67               |
| <b>Rocky</b>               |                                                   |                                 |                               |                    |                         |                    |                              |                  |
| Lake Irene <sup>2</sup>    | 720 (10)                                          | 25 (3.1)                        | 690 (1.3)                     | 61 (16)            | 200 (8.2)               | 58 (11)            | 22 (9.4)                     | 4.9 (31)         |
| Lone Pine Lake             | 420                                               | --                              | 380                           | 27                 | 86                      | 32                 | 6.8                          | --               |
| Mills Lake                 | 1000                                              | --                              | 1200                          | 110                | 310                     | 130                | 10                           | --               |
| <b>Rainier<sup>3</sup></b> |                                                   |                                 |                               |                    |                         |                    |                              |                  |
| Alta Vista                 | --                                                | 59                              | 170                           | <14                | <58                     | 77                 | 19                           | --               |
| Alta Vista                 | 37                                                | 70                              | 210                           | 60                 | <60                     | 120                | 18                           | --               |
| <b>Glacier</b>             |                                                   |                                 |                               |                    |                         |                    |                              |                  |
| Lower Snyder Lake          | 270                                               | 30                              | 290                           | 39                 | 83                      | 31                 | 6.6                          | 6.6              |
| Aster Park                 | 440                                               | 39                              | 580                           | 150                | 240                     | 120                | 15                           | 11               |
| <b>Denali</b>              |                                                   |                                 |                               |                    |                         |                    |                              |                  |
| Kahiltna Base Camp         | 27                                                | 32                              | 170                           | <14                | 64                      | <22                | 12                           | 3.8              |
| McLeod Lake                | 0.67                                              | 1.0                             | 1.8                           | <0.52              | <0.082                  | <0.76              | 0.63                         | 0.51             |
| Wonder Lake                | --                                                | 0.48                            | <0.19                         | <0.58              | <0.095                  | <0.88              | 0.065                        | --               |
| <b>Noatak</b>              |                                                   |                                 |                               |                    |                         |                    |                              |                  |
| Burial Lake                | 3.9                                               | 14                              | 110                           | 43                 | 31                      | 120                | 9.6                          | 2.3              |
| <b>Gates of the Arctic</b> |                                                   |                                 |                               |                    |                         |                    |                              |                  |
| Matcharak Lake             | 0.49                                              | 3.8                             | 6.5                           | <1.6               | 6.7                     | <2.3               | 0.76                         | 0.92             |

<sup>1</sup>RSD is relative standard deviation. Nondetects are depicted as having deposition values less than (<) their estimated method detection limits multiplied by SWE. Cases in which lab-blank concentrations exceeded 33% of sample concentrations are marked with '--'. <sup>2</sup>Sites at which field replicates were collected. <sup>3</sup>Two samples were collected at Alta Vista; the first one listed was collected on March 4, 2005 (before a snow event) whereas the second one listed was collected on March 17, 2005 (after the snow event). <sup>4</sup>Total chlorpyrifos is the sum of chlorpyrifos and chlorpyrifos oxon. <sup>5</sup>Total endosulfan is the sum of endosulfan I, endosulfan II, and endosulfan sulfate. <sup>6</sup>γ-HCH is γ-hexachlorocyclohexane. <sup>7</sup>α-HCH is α-hexachlorocyclohexane. <sup>8</sup>Total chlordane is the sum of trans-chlordane, cis-nonachlor, and trans-nonachlor. <sup>9</sup>HCb is hexachlorobenzene.

**SI Table 4.** Sub-cooled liquid vapor pressures, half-lives in air, and half-lives in soil for the four most-frequently detected current-use pesticides and the four most-frequently detected historic-use pesticides.

|                                | Vapor Pressure,<br>Pa, 25°C | Half-Life in Air,<br>days | Half-Life in Soil,<br>days |
|--------------------------------|-----------------------------|---------------------------|----------------------------|
| <b>Current-Use Pesticides</b>  |                             |                           |                            |
| Dacthal                        | 0.0066 <sup>a</sup>         | 24 <sup>c</sup>           | 100 <sup>a</sup>           |
| Chlorpyrifos                   | 0.0034 <sup>b</sup>         | 1 <sup>b</sup>            | 7 <sup>b</sup>             |
| Endosulfan I                   | 0.008 <sup>b</sup>          | 1 <sup>b</sup>            | 50 <sup>b</sup>            |
| γ-HCH                          | 0.027 <sup>b</sup>          | 43 <sup>d</sup>           | 730 <sup>b</sup>           |
| <b>Historic-Use Pesticides</b> |                             |                           |                            |
| Dieldrin                       | 0.016 <sup>b</sup>          | 2 <sup>b</sup>            | 730 <sup>b</sup>           |
| α-HCH                          | 0.1 <sup>b</sup>            | 59 <sup>d</sup>           | 70 <sup>e</sup>            |
| trans-Chlordanes               | 0.0032 <sup>b</sup>         | 2 <sup>b</sup>            | 730 <sup>b</sup>           |
| HCB                            | 0.2447 <sup>b</sup>         | 306 <sup>d</sup>          | 2190 <sup>b</sup>          |

<sup>a</sup>(1), <sup>b</sup>(2), <sup>c</sup>(3), <sup>d</sup>(4), <sup>e</sup>(5)

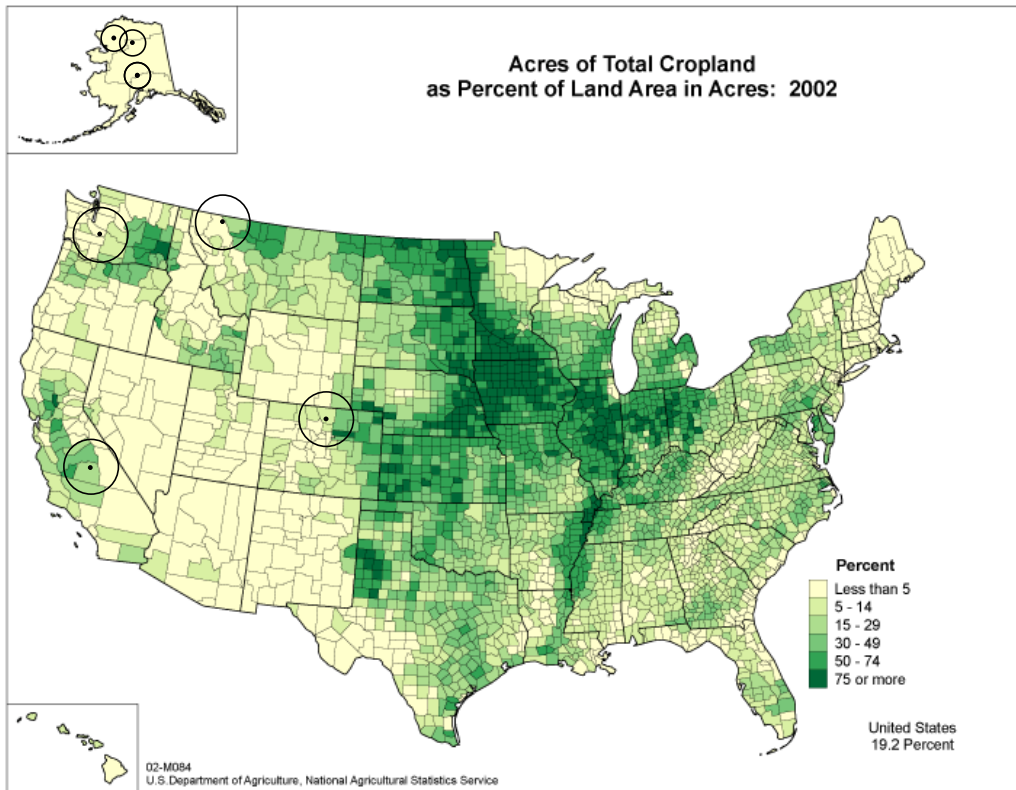

**SI Figure 1.** 2002 cropland map (U.S. National Agriculture Statistics Service) (6) with 150-km radius circles shown centered at each of the parks in this study.

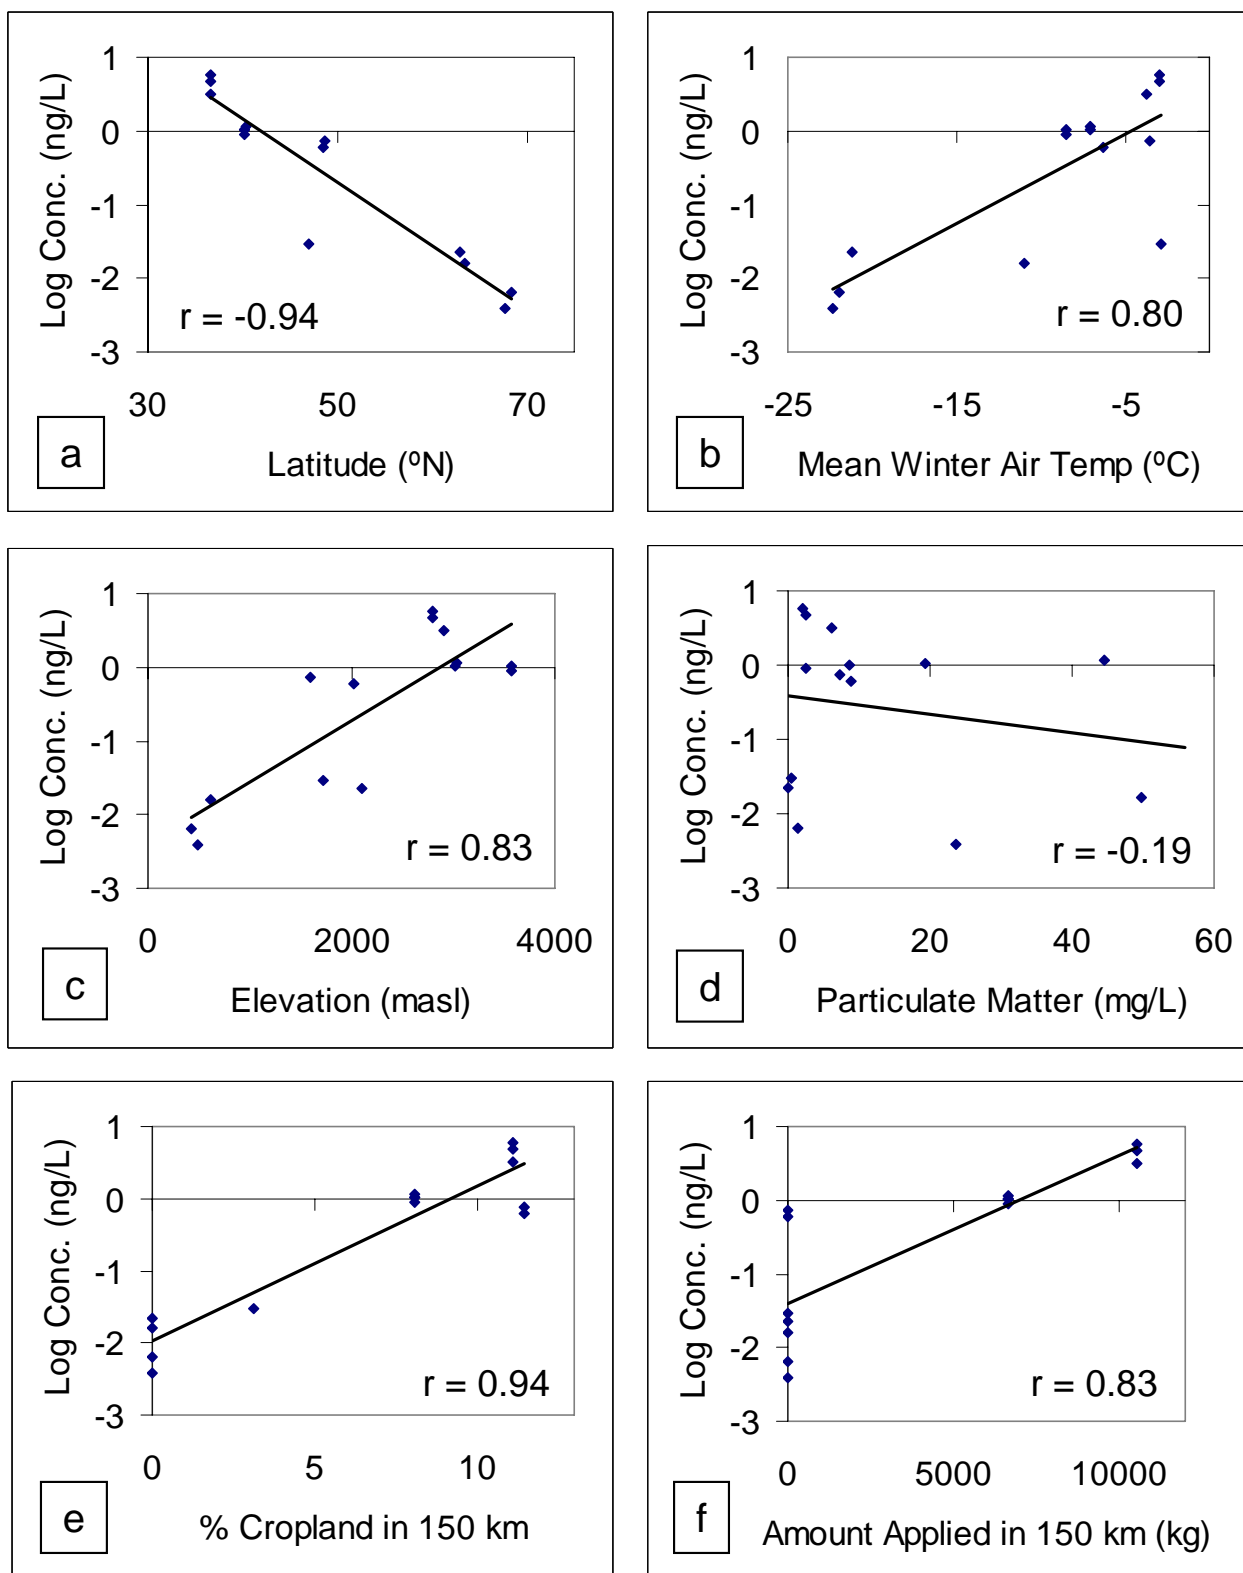

**SI Figure 2.** Correlation coefficients ( $r$ ) and plots for the log concentration of dacthal versus (a) latitude, (b) mean winter air temperature, (c) site elevation, (d) particulate matter concentration in snow samples, (e) cropland area as a percentage of total land area within a 150-km radius of the park, and (f) the quantity of dacthal applied within a 150-km radius of the park.

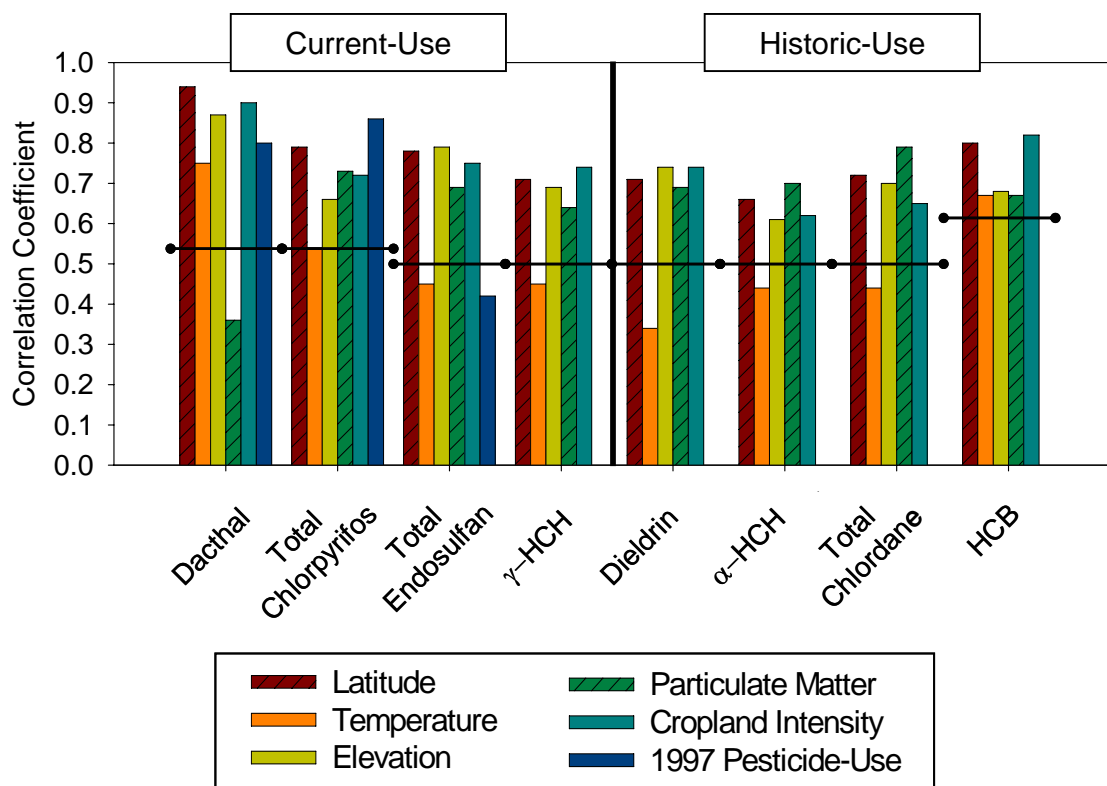

**SI Figure 3.** Correlation coefficients for log pesticide deposition with latitude, mean winter air temperature, elevation, particulate matter concentration, regional cropland intensity within 150 km, and the quantity of specific current-use pesticides applied within 150 km of each park in 1997. Correlation coefficients for 1997 pesticide use are only provided for pesticides that were used within 150 km of the parks in 1997 (i.e. dacthal, chlorpyrifos, and endosulfan). Diagonal lines through bars indicate negative correlation while solid bars indicate positive correlation. Horizontal lines indicate statistical significance at  $p < 0.05$ .



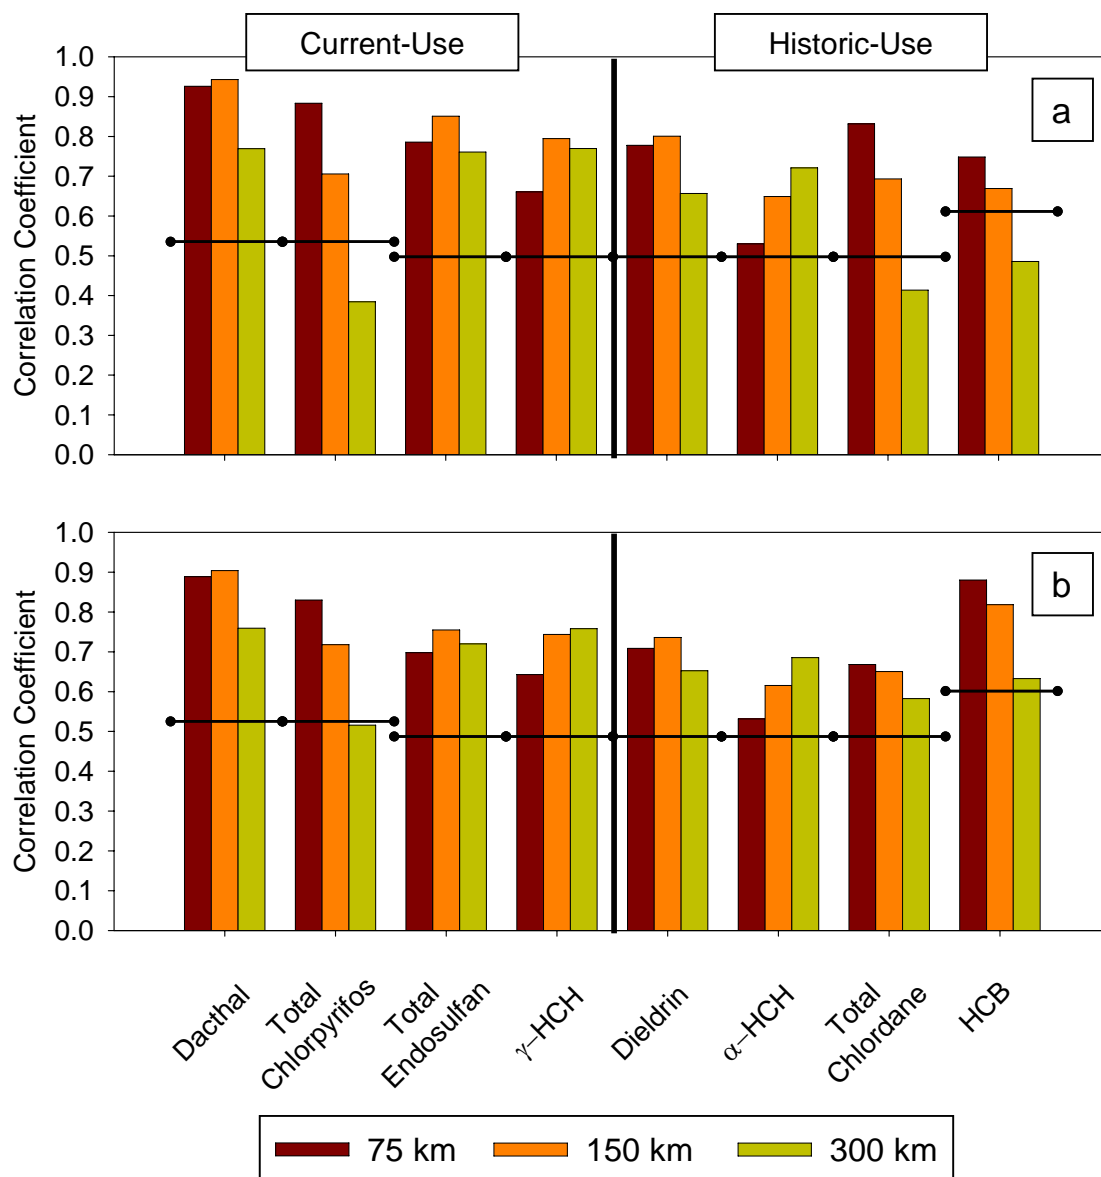

**SI Figure 4.** Correlation coefficients for (a) log pesticide concentration and (b) log pesticide deposition with regional cropland intensity where regional cropland intensity is cropland area as a percentage of total land area in 75, 150, and 300-km radii of the park. Horizontal lines indicate statistical significance at  $p < 0.05$ .

## REFERENCES

1. Wauchope, R. D.; Buttler, T. M.; Hornsby, A. G.; Augustijn-Beckers, P. W. M.; Burt, J. P. SCS/ARS/CES Pesticide properties database for environmental decision-making. *Rev. Environ. Contam. Toxicol.* **1992**, 123 67.
2. Mackay, D.; Shiu, W. Y.; Ma, K.-C. *Physical-Chemical Properties and Environmental Fate Handbook CRC netBASE (CD-ROM)*; CRC Press LLC Lewis Publishers: Boca Raton, FL, **2000**.
3. Syracuse Research, EPIWin Estimation Software, **2003**.
4. Brubaker, W. W., Jr.; Hites, R. A. OH reaction kinetics of gas-phase alpha- and gamma-HCH and HCB. *Environ. Sci. Technol.* **1998**, 32 (6), 766-769.
5. Beyer, A.; Mackay, D.; Matthies, M.; Wania, F.; Webster, E. Assessing long-range transport potential of persistent organic pollutants. *Environ. Sci. Technol.* **2000**, 34 (4), 699-703.
6. U.S. Department of Agriculture -- National Agriculture Statistics Service, **2002**. [http://151.121.3.33:8080/Census/Create\\_Census\\_US\\_CNTY.jsp#top](http://151.121.3.33:8080/Census/Create_Census_US_CNTY.jsp#top).
